# Supplementary material for: MicroRNAs miR-124 and miR-135a are potential regulators of the mineralocorticoid receptor gene (NR3C2) expression
Source: PubMed Central journal article supplement (PMC2806518; doi:10.1016/j.bbrc.2009.11.128), 2010-01-01
Supplement: mmc1.pdf [file mmc1.pdf]

**List of blood pressure candidate genes studied for microRNA binding sites - coordinates and 3'UTR lengths from UCSC genome browser (hg18 assembly)**

**Genes involved in renal water-salt balance**

| Gene    | Name                                                              | Chr | Start     | End       | 3' UTR length (bp) |
|---------|-------------------------------------------------------------------|-----|-----------|-----------|--------------------|
| ACE     | angiotensin I converting enzyme                                   | 17  | 58908166  | 58928711  | 252                |
| ACSM3   | SA hypertension-associated homolog                                | 16  | 20682813  | 20715979  | 196                |
| ADD1    | adducin 1 (alpha)                                                 | 4   | 2882590   | 2968794   | 1887               |
| AGT     | angiotensinogen preproprotein                                     | 1   | 227145006 | 227156676 | 602                |
| AGTR1   | angiotensin II receptor, type 1                                   | 3   | 149898356 | 149943489 | 886                |
| AGTR2   | angiotensin II receptor, type 2                                   | X   | 115113885 | 115117701 | 1195               |
| ATP1A1  | Na <sup>+</sup> /K <sup>+</sup> -ATPase alpha 1 subunit isoform b | 1   | 116627878 | 116659436 | 652                |
| BSND    | barttin                                                           | 1   | 55176638  | 55186485  | 163                |
| CLCNKA  | chloride channel Ka                                               | 1   | 16093792  | 16105850  | 391                |
| CLCNKB  | chloride channel Kb                                               | 1   | 16115658  | 16128782  | 391                |
| CYP11B1 | cytochrome P450, family 11, subfamily B                           | 8   | 143950777 | 143958238 | 2014               |
| CYP11B2 | cytochrome P450, subfamily XIB polypeptide 2                      | 8   | 143988977 | 143996261 | 1421               |
| CYP17A1 | cytochrome P450, family 17                                        | 10  | 104580280 | 104587280 | 165                |
| HSD11B1 | 11-beta-hydroxysteroid dehydrogenase 1                            | 1   | 206247945 | 206296689 | 546                |
| HSD11B2 | hydroxysteroid (11-beta) dehydrogenase 2                          | 16  | 66022537  | 66028953  | 1151               |
| KCNJ1   | potassium inwardly-rectifying channel J1                          | 11  | 128213125 | 128242478 | 1105               |
| KLK1    | kallikrein 1 preproprotein                                        | 19  | 56014216  | 56018855  | 435                |
| NEDD4L  | neural precursor cell expressed, developmentally                  | 18  | 53862778  | 54216369  | 1888               |
| NPPA    | natriuretic peptide precursor A                                   | 1   | 11840042  | 11842101  | 290                |
| NPPB    | natriuretic peptide precursor B preproprotein                     | 1   | 11851788  | 11853258  | 188                |
| NPPC    | natriuretic peptide precursor C                                   | 2   | 232615640 | 232616464 | 0                  |
| NPR1    | natriuretic peptide receptor 1                                    | 1   | 150464186 | 150479536 | 573                |
| NPR2    | natriuretic peptide receptor B precursor                          | 9   | 35782406  | 35799727  | 267                |
| NR3C2   | nuclear receptor subfamily 3, group C, member 2                   | 4   | 149357525 | 149721128 | 2575               |
| REN     | renin precursor                                                   | 1   | 200855605 | 200867122 | 196                |
| SCNN1A  | sodium channel, nonvoltage-gated 1 alpha                          | 12  | 6326276   | 6354976   | 1024               |
| SCNN1B  | sodium channel, nonvoltage-gated 1, beta                          | 16  | 23221141  | 23300117  | 494                |
| SCNN1G  | sodium channel, nonvoltage-gated 1, gamma                         | 16  | 23101541  | 23135701  | 1410               |
| SGK1    | serum/glucocorticoid regulated kinase 1                           | 6   | 134532082 | 134537695 | 1017               |
| SLC12A3 | solute carrier family 12, member 3                                | 16  | 55456643  | 55504850  | 32                 |
| SLC14A2 | solute carrier family 14 (urea transporter)                       | 18  | 41448764  | 41517056  | 574                |
| SLC22A2 | solute carrier family 22 member 2                                 | 6   | 160608203 | 160650370 | 673                |
| SLC8A1  | solute carrier family 8                                           | 2   | 40250937  | 40569095  | 248                |
| WNK1    | WNK lysine deficient protein kinase 1                             | 12  | 732993    | 888219    | 0                  |
| WNK4    | WNK lysine deficient protein kinase 4                             | 17  | 38186222  | 38202605  | 373                |

**Other blood pressure candidate genes**

|         |                                              |    |           |           |  |
|---------|----------------------------------------------|----|-----------|-----------|--|
| ABCC8   | ATP-binding cassette, sub-family C, member 8 | 11 | 17371008  | 17455025  |  |
| ADD2    | adducin 2                                    | 2  | 7090698   | 70800920  |  |
| ADD3    | adducin 3 (gamma)                            | 10 | 111757701 | 111885310 |  |
| ADM/AM  | adrenomedullin                               | 11 | 10283218  | 10285499  |  |
| ADORA1  | adenosine A1 receptor                        | 1  | 199828493 | 199868190 |  |
| ADORA2A | adenosine A2a receptor                       | 22 | 23153646  | 23162878  |  |
| ADRA1A  | alpha-1A-adrenergic receptor                 | 8  | 26661584  | 26778839  |  |
| ADRA2A  | alpha-2A-adrenergic receptor                 | 10 | 112826911 | 112830560 |  |
| ADRB2   | adrenergic, beta-2-, receptor, surface       | 5  | 148186349 | 148188381 |  |
| ADRB3   | adrenergic receptor, beta 3                  | 8  | 37939673  | 37943341  |  |
| AKR1B1  | aldo-keto reductase family 1, member B1      | 7  | 133584362 | 133601143 |  |
| APOA1   | apolipoprotein A-I preproprotein             | 11 | 116211679 | 116213548 |  |
| APOA2   | apolipoprotein A-II preproprotein            | 1  | 158005156 | 158006491 |  |
| APOC2   | apolipoprotein C-II precursor                | 19 | 50141083  | 50144657  |  |

|         |                                                |    |           |           |
|---------|------------------------------------------------|----|-----------|-----------|
| APOC3   | apolipoprotein C-III precursor                 | 11 | 116205834 | 116208997 |
| APOC4   | apolipoprotein C-IV                            | 19 | 50137335  | 50140591  |
| APOE    | apolipoprotein E precursor                     | 19 | 50100879  | 50104489  |
| AQP2    | aquaporin 2                                    | 12 | 48630796  | 48638929  |
| AVP     | arginine vasopressin-neurophysin II            | 20 | 3011203   | 3013370   |
| AVPR1A  | arginine vasopressin receptor 1A               | 12 | 61826483  | 61832857  |
| AVPR1B  | arginine vasopressin receptor 1B               | 1  | 202767011 | 202774698 |
| AVPR2   | arginine vasopressin receptor 2                | X  | 152691217 | 152693486 |
| BDKRB2  | bradykinin receptor B2                         | 14 | 95740950  | 95780536  |
| BRS3    | bombesin-like receptor 3                       | X  | 135295645 | 135300118 |
| CACNA1C | calcium channel, voltage-dependent, L type,    | 12 | 2032725   | 2677376   |
| CALCA   | calcitonin isoform CALCA preproprotein         | 11 | 14944792  | 14950408  |
| CMA1    | chymase 1, mast cell preproprotein             | 14 | 24044552  | 24047311  |
| CYP4A11 | cytochrome P450, family 4, subfamily A         | 1  | 47106868  | 47119437  |
| DBH     | dopamine beta-hydroxylase precursor            | 9  | 133531039 | 133554020 |
| DRD1    | dopamine receptor D1                           | 5  | 174800281 | 174803769 |
| DRD2    | dopamine receptor D2 isoform short             | 11 | 112785528 | 112851091 |
| ECE1    | endothelin converting enzyme 1                 | 1  | 21291658  | 21362213  |
| EDN1    | endothelin 1                                   | 6  | 12398645  | 12404761  |
| EDN2    | endothelin 2                                   | 1  | 41613542  | 41619390  |
| EDN3    | endothelin 3                                   | 20 | 57308894  | 57334441  |
| EDNRA   | endothelin receptor type A                     | 4  | 148759735 | 148823710 |
| EDNRB   | endothelin receptor type B                     | 13 | 77367617  | 77447665  |
| F2R     | coagulation factor II receptor precursor       | 5  | 76047547  | 76067054  |
| GAL     | galanin preproprotein                          | 11 | 68208559  | 68215218  |
| GALR    | galanin receptor 1                             | 18 | 73090721  | 73111081  |
| GCG     | glucagon preproprotein                         | 2  | 162824896 | 162834264 |
| GCK     | glucokinase                                    | 7  | 43957110  | 44002278  |
| GFPT1   | glucosamine-fructose-6-phosphate               | 2  | 69464058  | 69525976  |
| GH1     | growth hormone 1                               | 17 | 59348296  | 59349930  |
| GH2     | growth hormone 2                               | 17 | 59311306  | 59312955  |
| GIPR    | gastric inhibitory polypeptide receptor        | 19 | 50863342  | 50877557  |
| GLP1R   | glucagon-like peptide 1 receptor               | 6  | 39124595  | 39163497  |
| GNAI1   | guanine nucleotide binding protein (G protein) | 7  | 79408791  | 79493372  |
| GNB3    | guanine nucleotide-binding protein, beta-3     | 12 | 6819636   | 6826817   |
| GYS1    | glycogen synthase 1 (muscle)                   | 19 | 54163195  | 54188361  |
| GYS2    | glycogen synthase 2 (liver)                    | 12 | 21580390  | 21649048  |
| HP      | haptoglobin                                    | 16 | 70646009  | 70652458  |
| IAPP    | islet amyloid polypeptide precursor            | 12 | 21417085  | 21423683  |
| ICAM1   | intercellular adhesion molecule 1 precursor    | 19 | 10242779  | 10258291  |
| ICAM2   | intercellular adhesion molecule 2 precursor    | 17 | 59433688  | 59437839  |
| ICAM3   | intercellular adhesion molecule 3 precursor    | 19 | 10305454  | 10311300  |
| IGF1    | insulin-like growth factor 1                   | 12 | 101292143 | 101376791 |
| IGF2    | insulin-like growth factor 2                   | 11 | 2106924   | 2127409   |
| INS     | proinsulin precursor                           | 11 | 2137585   | 2139015   |
| INSR    | insulin receptor                               | 19 | 7063266   | 7245011   |
| KCNJ11  | potassium inwardly-rectifying channel J11      | 11 | 17363374  | 17366782  |
| KCNJ6   | potassium inwardly-rectifying channel J6       | 21 | 37918657  | 38210566  |
| KCNK2   | potassium channel, subfamily K, member 2       | 1  | 211567280 | 211798831 |
| KNG     | kininogen 1                                    | 3  | 187917822 | 187944443 |
| LDLR    | low density lipoprotein receptor precursor     | 19 | 11061132  | 11105490  |
| LEP     | leptin precursor                               | 7  | 127475282 | 127491632 |
| LEPR    | leptin receptor                                | 1  | 65598339  | 65814841  |
| LPL     | lipoprotein lipase precursor                   | 8  | 19841058  | 19869049  |

|          |                                                  |    |           |           |
|----------|--------------------------------------------------|----|-----------|-----------|
| LRP8     | low density lipoprotein receptor-related protein | 1  | 53423233  | 53505842  |
| MTHFR    | 5,10-methylenetetrahydrofolate reductase         | 1  | 11780053  | 11800381  |
| NOS1     | nitric oxide synthase 1 (neuronal)               | 12 | 116113699 | 116262302 |
| NOS2A    | nitric oxide synthase 2A                         | 17 | 23107920  | 23151682  |
| NOS3     | nitric oxide synthase 3 (endothelial cell)       | 7  | 150125795 | 150149323 |
| NPR3     | natriuretic peptide receptor C/guanylate cyclase | 5  | 32747422  | 32823009  |
| NPY      | neuropeptide Y                                   | 7  | 24097049  | 24104717  |
| NPY1R    | neuropeptide Y receptor Y1                       | 4  | 164602722 | 164611353 |
| NR3C1    | nuclear receptor subfamily 3, group C, member 1  | 5  | 142637689 | 142795270 |
| PDX1     | pancreatic and duodenal homeobox 1               | 13 | 27392157  | 27397394  |
| PLA2G1B  | phospholipase A2, group IB                       | 12 | 119222635 | 119228312 |
| PNMT     | phenylethanolamine N-methyltransferase           | 17 | 35078033  | 35080254  |
| PPP1CA   | protein phosphatase 1, catalytic subunit, alpha  | 11 | 66922228  | 66925952  |
| PPP1CC   | protein phosphatase 1, catalytic subunit, gamma  | 12 | 109620464 | 109643387 |
| PRCP     | prolylcarboxypeptidase                           | 11 | 82213058  | 82289205  |
| PRKCE    | protein kinase C, epsilon                        | 2  | 45790694  | 46326779  |
| PRKCQ    | protein kinase C, theta                          | 10 | 6509111   | 6662244   |
| PTGER2   | prostaglandin E receptor 2 (subtype EP2), 53kDa  | 14 | 51850863  | 51865070  |
| PTGER3   | prostaglandin E receptor 3, subtype EP3          | 1  | 71030057  | 71225512  |
| PTGIR    | prostaglandin I2 (prostacyclin) receptor (IP)    | 19 | 51815566  | 51820194  |
| PTGIS    | prostaglandin I2 (prostacyclin) synthase         | 20 | 47553818  | 47618114  |
| PTGS1    | prostaglandin-endoperoxide synthase 1            | 9  | 122212783 | 122237535 |
| PTGS2    | prostaglandin-endoperoxide synthase 2 precursor  | 1  | 183372627 | 183381213 |
| PTH1H    | parathyroid hormone-like hormone                 | 12 | 28002285  | 28016183  |
| PTH1R    | parathyroid hormone receptor 1 precursor         | 3  | 46894240  | 46920290  |
| RENBP    | renin binding protein                            | X  | 152721570 | 152731079 |
| SCN5A    | voltage-gated sodium channel type V alpha        | 3  | 38564558  | 38666167  |
| SCNN1D   | sodium channel, nonvoltage-gated 1, delta        | 1  | 1257499   | 1267332   |
| SELE     | selectin E precursor                             | 1  | 166423440 | 166434837 |
| SERPINA4 | serine (or cysteine) proteinase inhibitor, clade | 14 | 94097536  | 94105994  |
| SLC12A1  | sodium potassium chloride cotransporter 2        | 15 | 46287190  | 46382416  |
| SLC12A4  | solute carrier family 12, member 4               | 16 | 66535731  | 66560026  |
| SLC2A1   | solute carrier family 2                          | 1  | 43060612  | 43093594  |
| SLC2A2   | solute carrier family 2                          | 3  | 172196839 | 172227470 |
| SLC2A3   | solute carrier family 2                          | 12 | 7963094   | 7980138   |
| SLC2A4   | glucose transporter 4                            | 17 | 7125778   | 7132090   |
| SLC4A1   | solute carrier family 4, anion exchanger         | 17 | 39682566  | 39700993  |
| SLC4A2   | solute carrier family 4, anion exchanger, member | 7  | 150194387 | 150211257 |
| SLC4A3   | solute carrier family 4, anion exchanger         | 2  | 220317792 | 220332197 |
| SLC4A4   | solute carrier family 4, sodium bicarbonate      | 4  | 72569852  | 72802834  |
| SLC5A2   | solute carrier family 5, member 2                | 16 | 31401940  | 31409590  |
| SLC6A2   | solute carrier family 6 member 2                 | 16 | 54248057  | 54295199  |
| SLC8A2   | solute carrier family 8 member 2                 | 19 | 52623735  | 52666934  |
| SLC9A1   | solute carrier family 9, isoform A1              | 1  | 27109449  | 27165543  |
| SLC9A2   | solute carrier family 9, member 2                | 2  | 102694684 | 102786325 |
| SLC9A5   | solute carrier family 9                          | 16 | 65840356  | 65863594  |
| TBXA2R   | thromboxane A2 receptor                          | 19 | 3545504   | 3557658   |
| TBXAS1   | thromboxane A synthase 1                         | 7  | 138982136 | 139173186 |
| TGFB1    | transforming growth factor, beta 1               | 19 | 46528491  | 46551656  |
| TH       | tyrosine hydroxylase                             | 11 | 2141736   | 2149611   |
| TRH      | thyrotropin-releasing hormone                    | 3  | 131176261 | 131179478 |
| TRHR     | thyrotropin-releasing hormone receptor           | 8  | 110168902 | 110200989 |
| TRIP10   | thyroid hormone receptor interactor 10           | 19 | 6690707   | 6702528   |
| UCP3     | uncoupling protein 3                             | 11 | 73388985  | 73397778  |

|       |                                      |    |           |           |
|-------|--------------------------------------|----|-----------|-----------|
| VEGFA | vascular endothelial growth factor A | 6  | 43845931  | 43862199  |
| VEGFB | vascular endothelial growth factor B | 11 | 63758842  | 63762834  |
| VEGFC | vascular endothelial growth factor C | 4  | 177979840 | 178089044 |
