# Supplementary material for: MicroRNAs miR-124 and miR-135a are potential regulators of the mineralocorticoid receptor gene (NR3C2) expression
Source: PubMed Central journal article supplement (PMC2806518; doi:10.1016/j.bbrc.2009.11.128), 2010-01-01
Supplement: mmc2.pdf [file mmc2.pdf]

**Top 10 miRNA families with largest discrepancy between expected and observed number of Targetscan miRNA target site predictions in 3'UTRs of 160 hypertension candidate genes.**

P values were obtained with binomial tests. None of the tests reached Bonferroni corrected significance level ( $\alpha = 0.05 / 162 = 3.09 \times 10^{-4}$ ).

| miRNA family  | No of miRNA target site predictions |                 |          |         |
|---------------|-------------------------------------|-----------------|----------|---------|
|               | Observed                            |                 | Expected | P value |
|               | All genes                           | Candidate genes |          |         |
| miR-140       | 180                                 | 6               | 1.555    | 0.0053  |
| miR-122       | 144                                 | 4               | 1.244    | 0.0377  |
| miR-365       | 168                                 | 4               | 1.451    | 0.0597  |
| miR-214       | 402                                 | 7               | 3.473    | 0.0632  |
| miR-19        | 770                                 | 11              | 6.652    | 0.0756  |
| miR-150       | 183                                 | 4               | 1.581    | 0.0762  |
| miR-200bc/429 | 684                                 | 10              | 5.909    | 0.0778  |
| miR-455       | 126                                 | 3               | 1.088    | 0.0973  |
| miR-185       | 203                                 | 4               | 1.754    | 0.1014  |
| miR-496       | 723                                 | 10              | 246      | 0.1019  |
