# Supplementary material for: MicroRNAs miR-124 and miR-135a are potential regulators of the mineralocorticoid receptor gene (NR3C2) expression
Source: PubMed Central journal article supplement (PMC2806518; doi:10.1016/j.bbrc.2009.11.128), 2010-01-01
Supplement: mmc3.pdf [file mmc3.pdf]

**Oligonucleotide primers used for PCR reactions.**

| <b>Primer</b>                               | <b>Sequence</b>                                     | <b>Underlined restriction site</b> |
|---------------------------------------------|-----------------------------------------------------|------------------------------------|
| <b>Construction of NR3C2 3'UTR reporter</b> |                                                     |                                    |
| NR3C2-UTR-F                                 | 5'-GAC TAG TCC AAG CCG CTC TAC TTC CAC-3'           | BcuI                               |
| NR3C2-UTR-R                                 | 5'-GAC TGA GGC CGG CCT TGC TCC AAA ACA ACA GGT G-3' | FseI                               |
| <b>Cloning of miRNA expression plasmids</b> |                                                     |                                    |
| miR-124-1-F                                 | 5'-GAT CTA GAC TGT CTG TCA CAG GCT GCA C-3'         | XbaI                               |
| miR-124-1-R                                 | 5'-GAA GAT CTG ATG CTG TGG TCC CTT CCT C-3'         | BglII                              |
| miR-135a-2-F                                | 5'-GAT CTA GAT GGC TGA ATG TTG CTG AGT G-3'         | XbaI                               |
| miR-135a-2-R                                | 5'-GAA GAT CTG AAC ACC AGG CAG GTA GCA G-3'         | BglII                              |
| miR-19b-1-F                                 | 5'-GAT CTA GAT GAT GGT GGC CTG CTA TTT C-3'         | XbaI                               |
| miR-19b-1-R                                 | 5'-GAA GAT CTT CAC AAT CCC CAC CAA ACT C-3'         | BglII                              |
| miR-30e-F                                   | 5'-GAT CTA GAA GGG CCT TTG GAT TAG CAA G-3'         | XbaI                               |
| miR-30e-R                                   | 5'-GAA GAT CTC AGC CCA CAG AAA ACA AGG A-3'         | BglII                              |
| miR-130a-F                                  | 5'-GAT CTA GAG TCA GGG GGT TGG TGA AGA-3'           | XbaI                               |
| miR-130a-R                                  | 5'-GAA GAT CTG GGC TGT TAC CTC CCA GAA G-3'         | BglII                              |
| <b>Quantitative RT-PCR</b>                  |                                                     |                                    |
| firefly luciferase-F                        | 5'-TGC ACA TAT CGA GGT GGA CAT C-3'                 |                                    |
| firefly luciferase-R                        | 5'-TGC CAA CCG AAC GGA CAT-3'                       |                                    |
| Renilla luciferase-F                        | 5'-GCT TAT CTA CGT GCA AGT GAT GAT TT-3'            |                                    |
| Renilla luciferase-R                        | 5'-GAA ACT TCT TGG CAC CTT CAA CA-3'                |                                    |
| NR3C2-F                                     | 5'-AAA CAT ACG AAC AGC CAA TTT CTC T-3'             |                                    |
| NR3C2-R                                     | 5'-AGA CTG ATG CAT CTT CTC TTC ATT AAA G-3'         |                                    |
| GAPDH-F                                     | 5'-GCA CCG TCA AGG CTG AGA AC-3'                    |                                    |
| GAPDH-R                                     | 5'-GGA TCT CGC TCC TGG AAG ATG-3'                   |                                    |
